# Supplementary material for: High Levels of Soluble C5b-9 Complex in Dialysis Fluid May Predict Poor Prognosis in Peritonitis in Peritoneal Dialysis Patients
Source: PubMed Central journal article supplement (PMC5207753; doi:10.1371/journal.pone.0169111), 2017-01-03
Supplement: pone.0169111.s003.pdf [file pone.0169111.s003.pdf]

**Supplementary Table 1 Background of the institutes which episodes with peritonitis were studied.**

| Terms/Institutes           | Total number of PD patients (/observed term) | Number of episodes of peritonitis | Number of PD patients with peritonitis | Number of episodes of peritonitis to be used in the present study |
|----------------------------|----------------------------------------------|-----------------------------------|----------------------------------------|-------------------------------------------------------------------|
| 2008.1~2008.12             |                                              |                                   |                                        |                                                                   |
| Nagoya University Hospital | 47                                           | 4                                 | 4                                      | 1                                                                 |
| Daiyukai Daiichi Hospital  | 99                                           | 33                                | 26                                     | 17                                                                |
| 2009.1~2009.12             |                                              |                                   |                                        |                                                                   |
| Nagoya University Hospital | 50                                           | 5                                 | 5                                      | 0                                                                 |
| Daiyukai Daiichi Hospital  | 73                                           | 26                                | 15                                     | 20                                                                |
| 2010.1~2010.12             |                                              |                                   |                                        |                                                                   |
| Nagoya University Hospital | 53                                           | 7                                 | 6                                      | 0                                                                 |
| Daiyukai Daiichi Hospital  | 70                                           | 13                                | 10                                     | 13                                                                |
| 2011.1~2011.12             |                                              |                                   |                                        |                                                                   |
| Nagoya University Hospital | 59                                           | 6                                 | 6                                      | 2                                                                 |
| Daiyukai Daiichi Hospital  | 66                                           | 27                                | 20                                     | 23                                                                |
| 2012.1~2012.12             |                                              |                                   |                                        |                                                                   |
| Nagoya University Hospital | 54                                           | 4                                 | 4                                      | 2                                                                 |
| Daiyukai Daiichi Hospital  | 63                                           | 26                                | 19                                     | 17                                                                |
| Handa City Hospital        | 39                                           | 15                                | 10                                     | 1                                                                 |
| 2013.1~2013.12             |                                              |                                   |                                        |                                                                   |
| Nagoya University Hospital | 56                                           | 3                                 | 3                                      | 1                                                                 |
| Daiyukai Daiichi Hospital  | 65                                           | 19                                | 15                                     | 7                                                                 |
