# Supplementary material for: High Levels of Soluble C5b-9 Complex in Dialysis Fluid May Predict Poor Prognosis in Peritonitis in Peritoneal Dialysis Patients
Source: PubMed Central journal article supplement (PMC5207753; doi:10.1371/journal.pone.0169111), 2017-01-03
Supplement: pone.0169111.s004.pdf [file pone.0169111.s004.pdf]

|     |    |   |   |   |    |     |      |       |       |      |      |                  |      |      |      |      |      |      |        |        |        |       |       |       |        |        |       |       |       |       |
|-----|----|---|---|---|----|-----|------|-------|-------|------|------|------------------|------|------|------|------|------|------|--------|--------|--------|-------|-------|-------|--------|--------|-------|-------|-------|-------|
| 94  | 82 | 1 | 1 | 1 | 87 | 3.7 | 44.0 | 11.43 | 91.0  | 34.0 | 40.7 | G+               | 4451 | 4333 | 3785 | 5150 | 6420 | 18   | 246.83 | 702.81 | 228.05 | 55.5  | 162.2 | 60.3  | 3.044  | 2.928  | 1.573 | 2.145 | 1.487 | 1.097 |
| 95  | 56 | 1 | 1 | 0 | 20 | 3.6 | 52.0 | 8.40  | 86.0  | 27.0 | 53.6 | G-               | 2736 | 4619 | 4544 | 590  | 3440 | 6140 | 298.45 | 716.71 | 447.59 | 109.1 | 155.2 | 98.5  | 4.269  | 6.428  | 7.075 | 2.636 | 2.391 | 1.485 |
| 96  | 57 | 1 | 1 | 0 | 27 | 3.4 | 78.8 | 7.69  | 86.0  | 27.0 | 53.6 | fungus sp        | 4016 | 3541 | 3351 | 2670 | 3210 | 580  | 810.89 | 302.47 | 354.42 | 201.9 | 85.4  | 105.8 | 3.650  | 2.189  | 3.017 | 1.532 | 0.806 | 0.997 |
| 97  | 69 | 1 | 1 | 1 | 85 | 3.3 | 52.1 | 9.58  | 107.0 | 29.0 | 44.5 | fungus sp        | 2596 | 2620 | 4174 | 625  | 365  | 1110 | 144.20 | 166.33 | 543.05 | 55.6  | 63.5  | 130.1 | 1.922  | 2.266  | 4.157 | 1.561 | 1.635 | 2.806 |
| 98  | 32 | 1 | 1 | 0 | 34 | 4.0 | 62.7 | 19.36 | 102.0 | 33.0 | 70.9 | fungus sp        | 2605 | 4233 | 4078 | 3500 | 2000 | 1600 | 483.28 | 659.72 | 352.49 | 185.5 | 155.9 | 86.4  | 2.034  | 2.885  | 2.237 | 1.864 | 2.516 | 2.198 |
| 99  | 49 | 2 | 1 | 0 | 54 | 3.4 | 43.0 | 10.07 | 83.7  | 30.0 | 40.8 | G+               | 3236 | 5683 | 3661 | 3740 | 4630 | 150  | 149.72 | 747.14 | 226.08 | 46.3  | 131.5 | 61.8  | 8.665  | 14.861 | 4.024 | 3.127 | 3.685 | 2.666 |
| 100 | 68 | 2 | 1 | 1 | 40 | 3.0 | 38.0 | 8.63  | 78.4  | 30.4 | 43.0 | G+               | 3570 | 7267 | 3168 | 1810 | 6480 | 370  | 354.71 | 676.03 | 104.02 | 99.4  | 93.0  | 32.8  | 11.409 | 10.295 | 3.437 | 2.910 | 3.762 | 2.755 |
| 101 | 46 | 2 | 1 | 0 | 12 | 3.2 | 55.0 | 9.99  | 77.0  | 26.6 | 31.1 | culture negative | 7007 | 7443 | 5837 | 580  | 600  | 10   | 867.80 | 372.10 | 128.90 | 123.8 | 50.0  | 22.1  | 12.525 | 5.127  | 5.018 | 4.003 | 2.335 | 2.220 |
| 102 | 48 | 2 | 0 | 0 | 72 | 3.8 | 38.0 | 12.35 | 103.0 | 29.2 | N/A  | G+               | 2525 | 4880 | 2743 | 1290 | 1260 | 80   | 167.96 | 605.18 | 84.60  | 66.5  | 124.0 | 30.8  | 2.437  | 4.100  | 2.282 | 0.622 | 0.461 | 0.399 |
| 103 | 61 | 2 | 1 | 1 | 2  | 3.4 | 43.0 | 10.07 | 65.4  | 23.0 | 53.5 | culture negative | 5652 | 4944 | 3099 | 6170 | 570  | 50   | 386.24 | 389.16 | 60.92  | 68.3  | 78.7  | 19.7  | 3.777  | 3.074  | 1.718 | 0.681 | 0.492 | 0.315 |
| 104 | 65 | 2 | 1 | 0 | 3  | 2.8 | 61.0 | 10.12 | 75.5  | 21.8 | 42.0 | culture negative | 5169 | 6403 | 4399 | 4410 | 600  | 50   | 342.64 | 309.04 | 219.70 | 66.3  | 48.3  | 49.9  | 4.077  | 3.360  | 2.469 | 3.503 | 3.276 | 2.164 |
